# Supplementary material for: A cyanoacrylate/triethyl citrate/nanosilica-based closure glue with wet-adhesion capability for treatment of superficial varicose veins
Source: Royal Society of Chemistry journal article supplement (doi:10.1039/d3tb00408b), 2023-01-01
Supplement: d3tb00408b1.xlsx [file d3tb00408b1.xlsx]

## Sheet: Acute toxicity 
Days	Acute toxicity							Acute toxicity
0	240.2	193.2	205.2	212.2	217.5	196.4	214.1	192.7	208.7	185.6
3	207.8	205.6	231.3	266.2	203.6	229.8	202	230.2	240.2	230.5
6	244.8	205.8	258.7	215.9	216.2	283.1	245.6	201.6	239.4	245.9
9	218.7	293.7	204.1	243.8	258.1	216.8	208.3	257.3	273.8	253.1
12	253.2	222.9	275.6	309.2	271	229.5	272.8	285	211.2	213.4
15	292.6	311.5	219.5	236.7	323.1	231.5	277.4	221.6	260	285.8
Days	control							control
0	222.05	216.2	230.7	238.4	205	200.2	191	190.9	182.3	173.7
3	219.3	232.2	246.8	265.1	234.3	176.5	208.6	185.6	197.4	189.4
6	247.8	239.3	280.2	264.5	256.3	213.3	190.7	182.2	204.3	195.9
9	260.9	274.6	290.6	263.9	243.4	172.4	189.9
12	278	283.6	193.5	201	248	270.2	196.3	189.5	304.8
15	286	181.4	210	290	320.9	212.4	196.1	292.8	198.8	261.9

## Sheet: sub-acute toxicity test
Weeks	sub-acute toxicity test							sub-acute toxicity test						sub-acute toxicity test							sub-acute toxicity test
0	169.3	192.3	250.7	173.6	208.2	195.7	199.5	196.5	198.14	189.6	185.2	162.7	197.8	203.1	189.5	158.6	180.8	198.4	175.8	201.3	183.03	169.9	155.9	207.4	198.99	185.9	184.5	172.4	234	187.4
1	197.14	290.43	243.56	241.62	207.32	274.17	151.17	180.16	183.72	208.71	236.1	187.07	183.82	168	179.05	212.41	179.6	203.98	182.02	190	193.5	194.4	217.6	180.8	177	184.7	164	204
2	286.6	324	328.2	235.3	271.4	235.3	240.7	206.9	224.8	202.3	206.6	211	240.9	190.5	209.6	201.3	225.7	205.6	245.9	274.8	233.2	211.6	215.8	184.4	217.6	193.2	210	200.5
3	223.5	256.5	216.6	227.3	216.9	225.4	234.7	233.2	214.8	265	221.3	200	247.2	311.2	231.6	203.9	263.1	227.3	248.8	248	234	211.2	260.5	333.5	241.9	262.1	303.8	262.9
4	383.5	265.5	304.8	325.6	370.9	259.4	273.7	250.5	258.1	215.4	328.7	259.7	232.1	227.3	262.2	237.4	229.1	269.5	206.6	275	242.9	221.7	230.6	219.4	276.1
5	352.73	344.3	429.02	395.65	237.46	270.5	233.2	238.2	231.56	261.12	221.6	242.7	187.34	217.39	197.54	260.57	257.26	217.8	297.44	227.01	302.48	343.84
6	432.6	352.24	347.23	389.51	249.4	275.64	249.11	249.94	247.19	226.95	252.83	235.2	244.3	216.03	276.84	226.3	303.2	232.11	278.09	275.8	346.3	214.3
7	302.8	388.95	346.09	303.89	242	264	242.5	271.5	236.7	268.2	295.6	247.24	283.8	252.76	298.5	268.3	294.5	275.2	280.48	278.1	299.57	229.3
8	382.14	474.34	364.82	405.95	261.13	244.75	261.41	262.4	285.02	305.25	251.1	262.2	284.02	367.8	221.64	285.24	259.46	271.66	254.32	221.85	236.33	290.99
9	491.7	380.46	415.33	238.25	258.55	306.92	254.8	257.7	281.96	266.4	230.52	244.29	285.65	386.16	279.7	247.96	292.64	307.43	242.07
10	452.69	404.63	518	263.68	261.02	245.03	264.38	272.3	314.2	289.5	235.4	267.66	260.32	412.67	309.81	278.61	296.69	339.87	329.94
11	417.32	479.83	525.31	406.75	240.75	264.55	296.04	253.16	326.05	281.46	268.72	269.57	279.12	317.52	322.45	338.73	272.42	310.01	263.11
12	481.38	430.4	423.25	535.94	370.01	297.03	321.98	260	306.01	310.1	310.95	265.93	278.3	250.39	326.25	239.65	291.13	259.75	271.12
Weeks	control
0	169.3	192.3	250.7	173.6	208.2	195.7	199.5
1	206.2	182.6	207	213	278.9	182.3	280.9
2	209.6	328.1	316.8	247.7	239	225.4	205.5
3	259.8	223.2	350.2	355.3	280.4	260.2	281.3
4	367.01	216.4	294.7	305.8	244.9	250.3	376.8
5	358.17	298.71	378.37	243.24	273.12	267.36	261.45
6	235.3	263.48	244.3	337.82	279.94	349.53	373.8
7	400.5	356	310	265.7	268.6	252.65	274.2
8	421.5	364.45	421.66	272.02	275.08	258.26	280.74
9	435.83	479.67	390.82	277.42	262.54	245.51	273.1
10	494.24	413.56	454.02	252.35	268.86	277.14	279.32
11	450.58	511.57	419.85	264.86	282.47	274.37	232.31
12	430.03	461.1	521.96	236.72	263.1	278.69	288.69
