# Supplementary material for: A cyanoacrylate/triethyl citrate/nanosilica-based closure glue with wet-adhesion capability for treatment of superficial varicose veins
Source: Royal Society of Chemistry journal article supplement (doi:10.1039/d3tb00408b), 2023-01-01
Supplement: d3tb00408b2.pdf [file d3tb00408b2.pdf]

**A cyanoacrylate/triethyl citrate/nanosilica-based closure  
glue with wet-adhesion capability for treatment of  
superficial varicose veins**

*Jia Wang<sup>ab</sup>, Xia Tian<sup>c</sup>, Wei Zhang<sup>b</sup>, Xiao Dong<sup>ab</sup>, Zhanguang Wang<sup>c</sup>, Shiyuan Wang<sup>b</sup>,  
Yonghan Liang<sup>c</sup>, Yunlan Li<sup>a\*</sup>, Wei Wang<sup>c\*</sup>, Liang Xu<sup>b\*</sup>.*

<sup>a</sup> School of Pharmaceutical Science, Shanxi Medical University, 56 Xinjian South Road, Taiyuan, 030001, China.

<sup>b</sup> State Key Laboratory of Toxicology and Medical Countermeasures, Beijing Institute of Pharmacology and Toxicology, 27 Taiping road, Beijing, 100850, China.

<sup>c</sup> Venaend(Beijing) Medical Technology co., LTD, 3 Yongchangbei road, 100176, China

*[\*] Corresponding author*

Email: liyunlanrr@163.com (Y. Li), 450853873@qq.com (W. Wang),  
wj24998@163.com (L. Xu)

**Table S1** The adhesive capability of FAL-006 and Butyl-CA

| Group    | Shear tension strength (kPa) | T-peel strength (N cm <sup>-1</sup> ) | Tension Strength (MPa) | Wound closure strength (N) |
|----------|------------------------------|---------------------------------------|------------------------|----------------------------|
| FAL-006  | 277.2 ± 52 kPa               | 7.16±2                                | 13.44±0.8              | 15.6±5                     |
| Butyl-CA | 301.5 ± 35 kPa               | 6.84±2.4                              | 10.4±2.88              | 19±4                       |

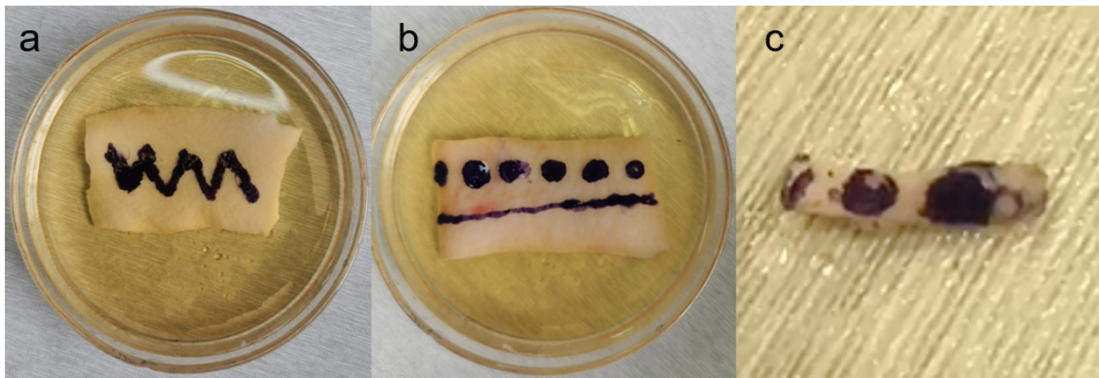

**Fig.S1** Strong underwater adhesion to tissue in serum. (a) Underwater writability pig skin, (b) underwater sustainable extrusion in pig skin, (c) Extrusion moulding and localization of blood vessels by FAL-006 in serum

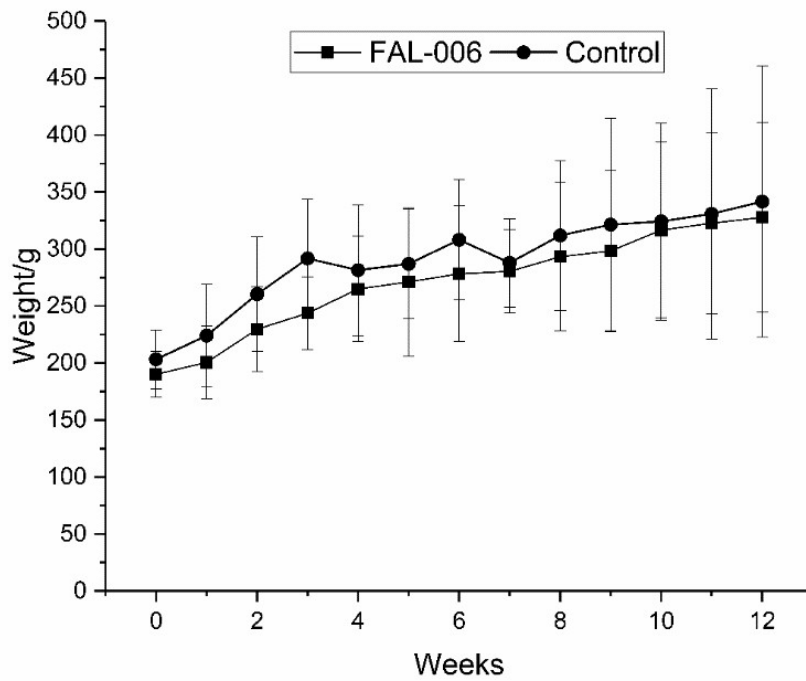

**Fig.S1** Body weights of rats in the sub-chronic toxicity test

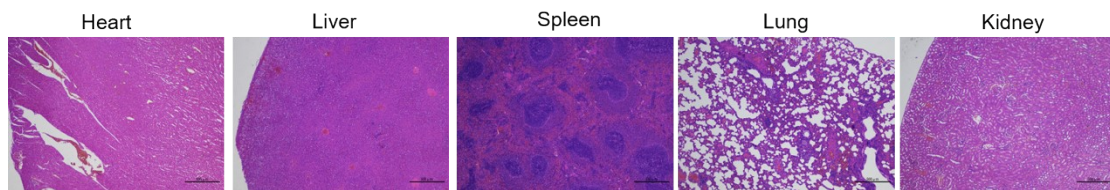

**Fig.S2** Pathological analysis of the rats half a month after injection with FAL-006. The heart, liver, spleen, lung, kidney and skin were stained by H&E. Bar scale=500  $\mu$ m.

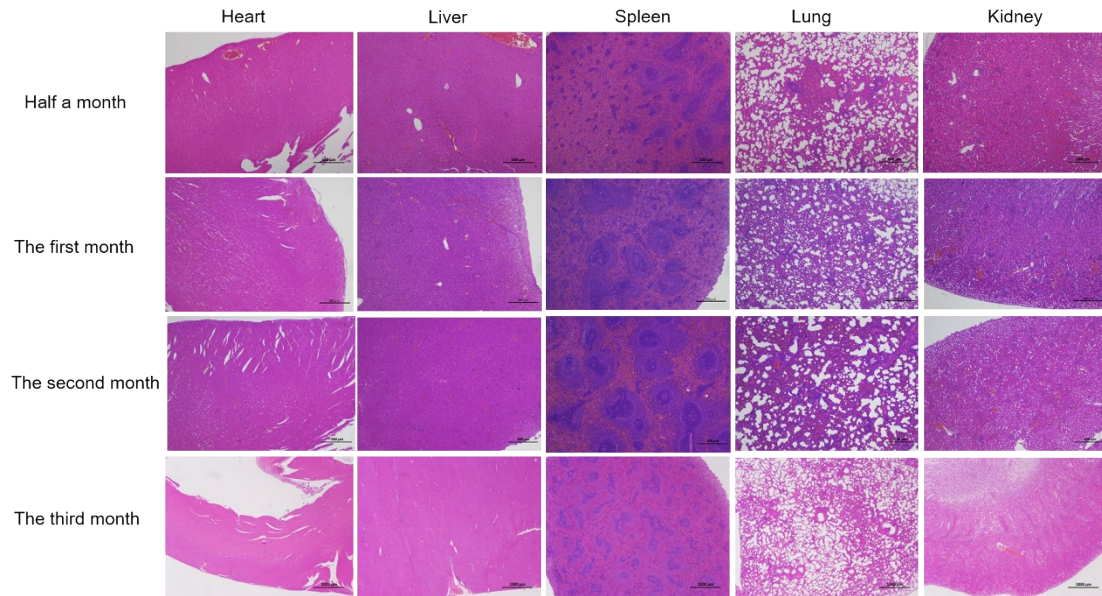

**Fig.S3** Pathological analysis of the rats after injection with FAL-006. The pictures were taken at half a month, 1 month, 2 months, and 3 months after injection. Their hearts, livers, spleens, lungs, kidneys and skin were stained by H&E. Bar scale=500/1000  $\mu\text{m}$ .

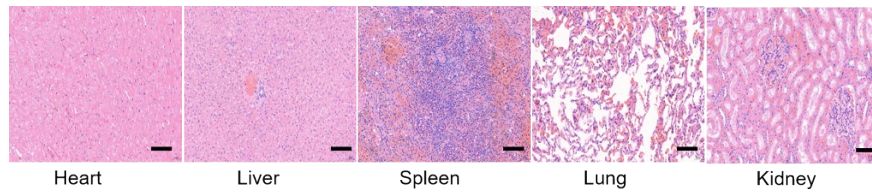

**Fig.S5** Closure test of lower extremity vein of sheep with FAL-006. Their hearts, livers, spleens, lungs and kidneys were stained by H&E. Bar scale=500  $\mu\text{m}$ .

**Table S2** The serum index of rats in the acute toxicity test

| Serum index  | Experimental group | Control      |
|--------------|--------------------|--------------|
| AST (U/L)    | 99.99±13.23        | 120.61±18.25 |
| γ-GT (U/L)   | 3.71±0.45          | 4.38±1.22    |
| ALP (U/L)    | 269.02±113.21      | 280.12±90.16 |
| BUN (mg/dL)  | 16.15±2.35         | 17.17±5.06   |
| CR (μmol/L)  | 34.89±7.66         | 50.78±8.71   |
| TG (mmol/L)  | 1.58±0.24          | 1.38±1.05    |
| TC (mmol/L)  | 3.09±0.49          | 2.11±4.02    |
| GLU (mmol/L) | 7.19±1.25          | 11.05±1.23   |
| TP (g/L)     | 69.99±4.12         | 70.68±10.55  |
| Na (mmol/ L) | 158.54±10.03       | 143.69±0.87  |
| Cl (mmol/l)  | 110.35±2.75        | 102.11±2.57  |
| Ca (mmol/ L) | 2.62±0.34          | 2.51±0.26    |
| P (mmol/ L)  | 3.35±0.41          | 3.18±0.91    |
| K (mmol/ L)  | 4.91±0.65          | 7.13±1.08    |

**Table S3** The serum index of rats in the sub-chronic toxicity test

| Serum index  | Half a month | First month   | Second month | Third month  | Control      |
|--------------|--------------|---------------|--------------|--------------|--------------|
| GT (U/L)     | 4.16±1.99    | 3.23±1.20     | 4.38±0.36    | 3.73±0.85    | 4.38±1.22    |
| ALB (g/L)    | 34.97±3.06   | 38.47±2.23    | 39.85±2.07   | 35.67±0.86   | 25.16±8.31   |
| ALP (U/L)    | 239.29±52.17 | 267.76±133.46 | 266.22±15.92 | 270.15±28.92 | 280.12±90.16 |
| BUN (mg/dL)  | 21.89±1.35   | 16.43±1.45    | 17.38±1.38   | 23.84±5.62   | 17.17±5.06   |
| TG (mmol/L)  | 1.53±0.30    | 1.54±0.05     | 2.01±0.34    | 2.16±0.74    | 1.38±1.05    |
| TC (mmol/L)  | 3.19±0.19    | 3.22±0.38     | 3.47±0.65    | 2.82±0.37    | 3.11±3.02    |
| GLU (mmol/L) | 6.29±1.32    | 7.62±1.17     | 6.40±0.46    | 5.37±0.38    | 11.05±1.23   |
| TP (g/L)     | 70.88±4.61   | 77.37±6.87    | 79.12±4.21   | 73.64±3.23   | 70.68±10.55  |
| Na (mmol/L)  | 123.22±1.01  | 163.23±0.52   | 145.30±1.27  | 135.51±14.76 | 143.69±0.87  |
| Cl (mmol/L)  | 127.09±3.41  | 106.59±1.02   | 113.07±1.83  | 109.73±0.43  | 102.11±2.57  |
| Ca (mmol/L)  | 2.37±0.08    | 2.52±0.06     | 2.10±0.23    | 2.26±0.35    | 2.51±0.26    |
| P (mmol/L)   | 3.47±0.20    | 2.66±0.26     | 2.20±0.16    | 2.75±0.39    | 3.18±0.91    |
| K (mmol/L)   | 7.54±1.35    | 4.36±0.33     | 5.81±0.29    | 3.53±0.23    | 7.13±1.08    |



**Table S5** The results of skin sensitization test induced by FAL-006 in guinea pigs

| Animal number                                         | Normal saline extract |     |         |     | Cottonseed oil extract |     |         |     |
|-------------------------------------------------------|-----------------------|-----|---------|-----|------------------------|-----|---------|-----|
|                                                       | FAL-006               |     | control |     | FAL-006                |     | control |     |
|                                                       | 24h                   | 48h | 24h     | 48h | 24h                    | 48h | 24h     | 48h |
| 1                                                     | 0                     | 0   | 0       | 0   | 0                      | 0   | 0       | 0   |
| 2                                                     | 0                     | 0   | 0       | 0   | 0                      | 0   | 0       | 0   |
| 3                                                     | 0                     | 0   | 0       | 0   | 0                      | 0   | 0       | 0   |
| 4                                                     | 0                     | 0   | 0       | 0   | 0                      | 0   | 0       | 0   |
| 5                                                     | 0                     | 0   | 0       | 0   | 0                      | 0   | 0       | 0   |
| 6                                                     | 0                     | 0   | 0       | 0   | 0                      | 0   | 0       | 0   |
| 7                                                     | 0                     | 0   | 0       | 0   | 0                      | 0   | 0       | 0   |
| 8                                                     | 0                     | 0   | 0       | 0   | 0                      | 0   | 0       | 0   |
| score                                                 |                       |     |         |     |                        |     |         |     |
| Incidence of<br>positive<br>excitation results<br>(%) | 0                     |     | 0       |     | 0                      |     | 0       |     |



**Table S6** The results of Intracutaneous irritation test induced by FAL-006 in rabbits

| Time  | Animal number | Normal saline extract |       |          |       | Cottonseed oil extract |       |          |       |
|-------|---------------|-----------------------|-------|----------|-------|------------------------|-------|----------|-------|
|       |               | FAL-006               |       | Control  |       | FAL-006                |       | Control  |       |
|       |               | erythema              | edema | erythema | edema | erythema               | edema | erythema | edema |
| 24h   | 1#            | 0                     | 0     | 0        | 0     | 0                      | 0     | 0        | 0     |
|       | 2#            | 0                     | 0     | 0        | 0     | 0                      | 0     | 0        | 0     |
| 48h   | 1#            | 0                     | 0     | 0        | 0     | 0                      | 0     | 0        | 0     |
|       | 2#            | 0                     | 0     | 0        | 0     | 0                      | 0     | 0        | 0     |
| 72h   | 1#            | 0                     | 0     | 0        | 0     | 0                      | 0     | 0        | 0     |
|       | 2#            | 0                     | 0     | 0        | 0     | 0                      | 0     | 0        | 0     |
| total | 1#            | 0                     |       | 0        |       | 0                      |       | 0        |       |
| score | 2#            | 0                     |       | 0        |       | 0                      |       | 0        |       |

**Table S7** The blood routine examination of sheep before and after surgery

| Blood routine index | Before surgery | After surgery | Normal range |
|---------------------|----------------|---------------|--------------|
| WBC ( $10^9/L$ )    | 7.96           | 7.15          | 5.80~25.00   |
| Neu # ( $10^9/L$ )  | 4.38           | 2.91          | 2.12~10.10   |
| Lym # ( $10^9/L$ )  | 2.88           | 3.45          | 3.12~22.10   |
| Mon # ( $10^9/L$ )  | 0.09           | 0.1           | 0.00~1.42    |
| Eos # ( $10^9/L$ )  | 0.61           | 0.69          | 0.00~1.32    |
| Bas # ( $10^9/L$ )  | 0              | 0             | 0.00~0.35    |
| Neu (%)             | 0.551          | 0.406         | 0.130~0.580  |
| Lym (%)             | 0.361          | 0.482         | 0.350~0.830  |
| Mon (%)             | 0.012          | 0.014         | 0.000~0.110  |
| Eos (%)             | 0.076          | H 0.098       | 0.000~0.080  |
| Bas (%)             | 0              | 0             | 0.000~0.025  |
| RBC ( $10^{12}/L$ ) | 14.4           | 16.91         | 10.00~21.00  |
| HGB (g/L)           | 84             | 99            | 62~135       |
| HCT (%)             | 0.238          | 0.295         | 0.190~0.360  |
| MCV (fL)            | 16.5           | 17.5          | 13.0~23.0    |
| MCH (pg)            | 5.8            | 5.3           | 4.2~7.8      |
| MCHC (g/L)          | 353            | 364           | 300~380      |
| RDW-CV (%)          | 0.268          | 0.251         | 0.180~0.300  |
| RDW-SD (fL)         | 19             | 18.6          | 12.1~23.1    |

**Table S8** The serum index of sheep before and after surgery

| The serum index     | Before surgery | After surgery |
|---------------------|----------------|---------------|
| ALT (U/L)           | 38.472         | 31.394        |
| AST (U/L)           | 144.181        | 129.389       |
| ALB (g/L)           | 31.51          | 36.940        |
| UREA (mmol/L)       | 11.5           | 8.215         |
| CREA ( $\mu$ mol/L) | 77.923         | 57.644        |
| $\gamma$ -GT (U/L)  | 48.718         | 68.847        |
| DBIL (umol/L)       | 9.84           | 5.606         |
| TBIL (umol/L)       | 13.402         | 9.595         |
| ALP (U/L)           | 122.856        | 143.657       |
| UA (umol/L)         | 86.08          | 69.928        |
| TBA (umol/L)        | 4.579          | 3.586         |
